# Supplementary material for: Impact of Glucocorticoid on a Cellular Model of Parkinson’s Disease: Oxidative Stress and Mitochondrial Function
Source: MDPI journal article supplement (doi:10.3390/brainsci11081106), 2021-08-22
Supplement: s1 [file s1]

## Supplementary Material

### 1. Cell viability

To examine the impact of CORT administration on the dopaminergic neuronal model of PD induced by the neurotoxin MPP<sup>+</sup>, we tested different concentrations of CORT, MPP<sup>+</sup> and their co-incubation, for the ability to damage cells without producing notable necrosis or cytotoxicity (Supplementary Figure 1). The doses chosen in the study were 0.5  $\mu$ M CORT and 200  $\mu$ M MPP<sup>+</sup>, increasing cell death by 14.2% and 19.8% respectively with respect to control. In the case of the co-incubation, a 25.3% increase was found.

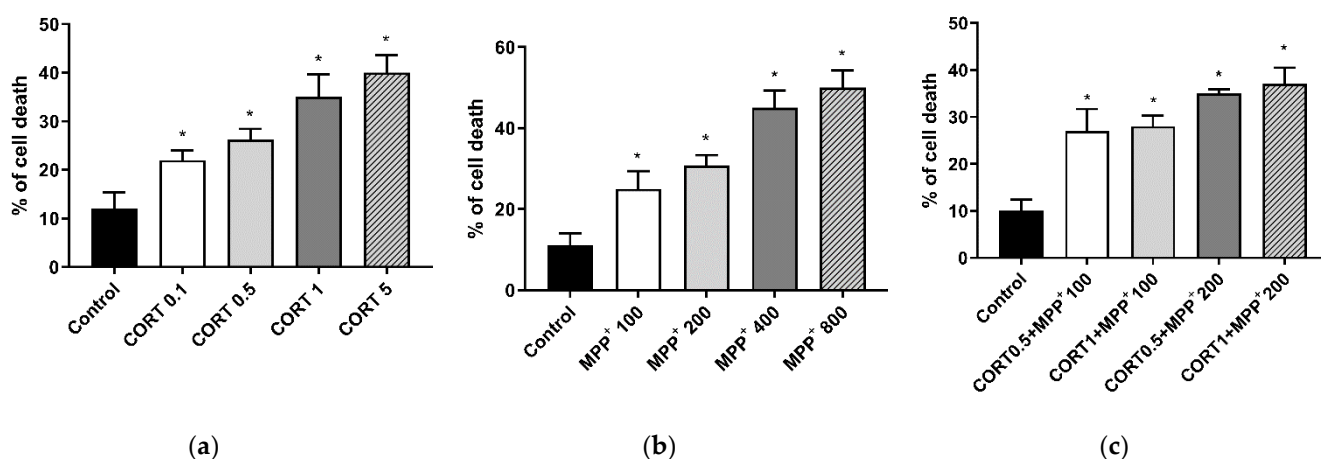

**Figure S1.** Cell death after 6 h of incubation with different concentrations ( $\mu$ M) of corticosterone (CORT), MPP<sup>+</sup> and their combination (CORT + MPP<sup>+</sup>). (a) Effect on cellular viability of different concentrations of corticosterone (CORT); (b) Effect on cellular viability of different concentrations of MPP<sup>+</sup>; (c) Effect on cellular viability of different concentrations of CORT + MPP<sup>+</sup>. Data were combined from three to five independent experiments and presented as mean  $\pm$  SEM. \* $p < 0.05$  compared to control cells.

### 2. Immunocytochemistry procedure

We confirmed the expression of the dopaminergic marker TH in the cell cultures, checking that they were composed of dopaminergic neuronal cells.

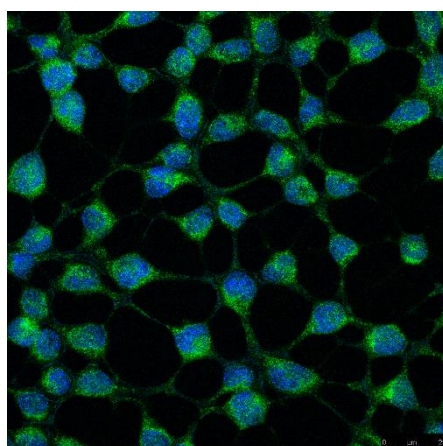

**Figure S2.** Neuronal marker in SN4741 neuronal cells. Representative immunocytochemistry image of the dopaminergic marker TH in cells.
